# Supplementary material for: Urinary Cystatin C and Tubular Proteinuria Predict Progression of Diabetic Nephropathy
Source: PubMed Central journal article supplement — Diabetes Care. 2013 Feb 13;36(3):656–61. doi: 10.2337/dc12-0849 (PMC3579333; doi:10.2337/dc12-0849), 2013-02-13
Supplement: supp_dc12-0849v120849_DC120849SupplementaryData.pdf [file supp_dc12-0849v120849_DC120849SupplementaryData.pdf]

SUPPLEMENTARY DATA

**Supplementary Table 1.** Changes of clinical characteristics between baseline and end of study. Shows the changes of several important parameters related to diabetic nephropathy during follow-up period and provides information about the natural changes of these parameters in this observational study.

|                                    | Baseline         | End of study     |
|------------------------------------|------------------|------------------|
| Serum creatinine, mg/dL            | 0.96 ± 0.32      | 1.05 ± 0.56      |
| Serum cystatin C, mg/dL            | 0.99 ± 0.38      | 1.00 ± 0.52      |
| eGFR groups, n (%)                 |                  |                  |
| ≥ 90 mL/min/1.73 m <sup>2</sup>    | 135 (57.0)       | 118 (49.8)       |
| 60–89 mL/min/1.73 m <sup>2</sup>   | 83 (35.0)        | 86 (36.3)        |
| 30–59 mL/min/1.73 m <sup>2</sup>   | 19 (8.0)         | 28 (11.8)        |
| < 30 mL/min/1.73 m <sup>2</sup>    | –                | 5 (2.1)          |
| Albuminuria groups, n (%)          |                  |                  |
| Normoalbuminuria                   | 149 (62.8)       | 148 (62.4)       |
| Microralbuminuria                  | 58 (24.5)        | 53 (22.4)        |
| Macroalbuminuria                   | 30 (12.7)        | 36 (15.2)        |
| Urine albumin, mg/dL               | 1.6 (0.7–5.0)    | 1.8 (0.8–5.8)    |
| Urine ACR, mg/g                    | 18 (8–56)        | 19 (9–65)        |
| Urine Cystatin C, mg/L             | 0.05 (0.03–0.07) | 0.07 (0.05–0.13) |
| Urine CCR, µg/mmoL                 | 7.2 (4.2–11.1)   | 9.7 (6.1–19.3)   |
| Urine NAP, mg/dL                   | 9.0 (5.9–14.2)   | 11.2 (7.3–16.7)  |
| Urine NAPCR, mg/g                  | 111 (74–174)     | 135 (94–195)     |
| Antihypertensive medication, n (%) | 99 (41.8)        | 147 (62.0)       |
| Lipid lowering agent, n (%)        | 149 (62.9)       | 184 (77.6)       |

Data are expressed as mean ± SD for parametric variables and median (interquartile range) for nonparametric variables. ACR, albumin-to-creatinine ratio; CCR, Cystatin C-to-creatinine ratio; eGFR, estimated glomerular filtration rate; NAP, nonalbumin protein; NAPCR, nonalbumin protein-to-creatinine ratio.

## SUPPLEMENTARY DATA

**Supplementary Table 2.** Univariate regression analysis for annual rate of decline in eGFR with clinical variables. shows significant clinical factors affecting with a decline in eGFR (to select the variables by using in multivariate analysis) in this study cohort and provides the information to understand study population.

| Variables                | Standard $\beta$ | <i>P</i> value |
|--------------------------|------------------|----------------|
| Age, years               | 0.115            | 0.078          |
| SBP, mmHg                | 0.165            | 0.011          |
| HbA1c, %                 | 0.154            | 0.023          |
| Uric acid, mg/dL         | 0.209            | 0.001          |
| Serum Cystatin C, mg/L   | 0.334            | <0.001         |
| Urine ACR, mg/g*         | 0.265            | <0.001         |
| Urine Cystatin C, mg/L*  | 0.190            | 0.003          |
| Urine CCR, $\mu$ g/mmoL* | 0.272            | <0.001         |
| Urine NAP, mg/dL*        | 0.276            | <0.001         |
| Urine NAPCR, mg/g*       | 0.361            | <0.001         |

\*Logarithm-transformed values were used for analysis. SBP, systolic blood pressure; ACR, albumin-to-creatinine ratio; CCR, Cystatin C-to-creatinine ratio; NAP, nonalbumin protein; NAPCR, nonalbumin protein-to-creatinine ratio.
